# Supplementary material
Source: PubMed Central journal article supplement (PMC3196093)
Supplement: supp_M111.257071_jbc.M111.257071-1.pdf [file supp_M111.257071_jbc.M111.257071-1.pdf]

**sFigure 1. Immunofluorescence, ELISA and mRNA profiles of different types of senescent cells with or without p16<sup>INK4a</sup> expression.**

**A.** IL-6, IL-8, Ras<sup>V12</sup>, p21<sup>CIP1/WAF1</sup>, p16<sup>INK4a</sup> and p53 expression in presenescent (PRE) and senescent (SEN) cells. In the top panel WI-38 cells were analyzed by immunofluorescence and in the lower panels the indicated cells were analyzed by western blotting.

For immunofluorescence, each panel is a different field. Senescence inducers are shown on the left, and the SA-Bgal and growth status are shown on the right. Cultures were considered growth positive (+) when >70% of cells incorporated BrdU over a 1 d interval, and negative (-) when <10% of cells incorporated BrdU over the same period. Cultures were considered SA-Bgal positive (+) when >80% of cells stained for SA-Bgal and negative (-) when <5% of cells stained.

For western analysis, the two panels on the left show the indicated protein expression in HCA2 cells infected with control lentiviruses (PRE) or lentiviruses encoding p16<sup>INK4a</sup> (5 d after infection) or Ras<sup>V12</sup> (8 d after infection). The four panels on the right show indicated protein expression in IMR90 cells infected with control lentiviruses (PRE) or lentiviruses encoding p16<sup>INK4a</sup> (10 d after infection), Ras<sup>V12</sup> (10 d after infection), p21<sup>CIP1/WAF1</sup> (3 d after infection) or an shRNA targeting p16<sup>INK4a</sup> (5 d after infection).

**B.** Soluble factors (IL-6, IL-8, GRO $\alpha$ ) produced by the indicated cells were determined by ELISA ( $\times 10^{-6}$  pg/cell in the top panel or pg/1000 cells in the lower panel).

**C.** The indicated mRNA levels expressed by various senescent (SEN) cell types (L3P in PRE cells = control vector).

**D.** ELISA measurements of IL-6 and IL-8 secretion by cells expressing p16<sup>INK4a</sup> or depleted of p16<sup>INK4a</sup> (shp16) (complement to Fig. 3).

**E.** Fold variation for ELISA measurements of IL-6 secretion by irradiated HCA2 cells (SEN(XRA)) and similar HCA2 cells induced to ectopically express p16<sup>INK4a</sup> 48 hours after irradiation (SEN(XRA > p16)).

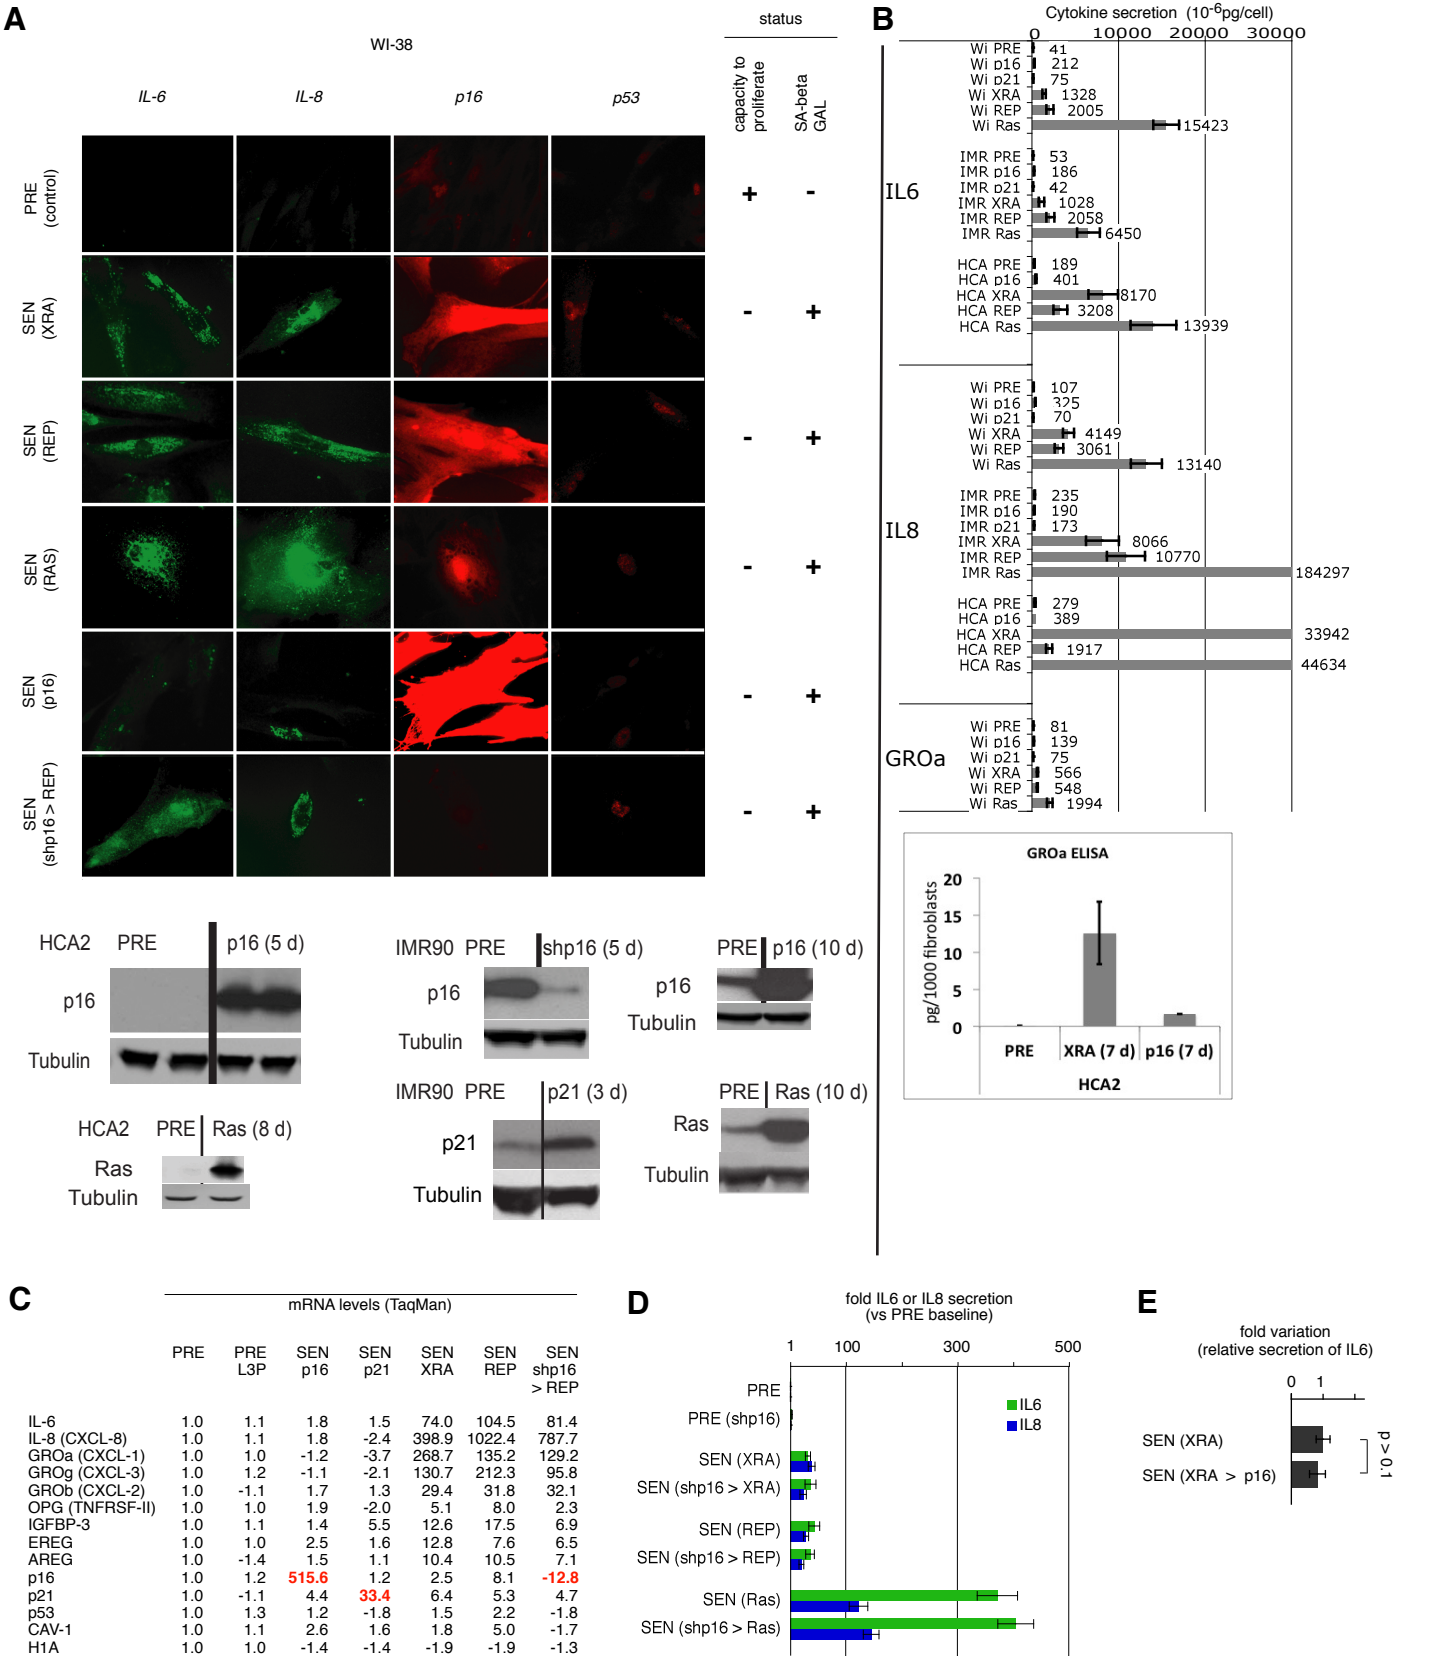

sFigure 1 (supplement) \_ Coppé et al
